# Supplementary material for: Global Survey of the Full-Length Cabbage Transcriptome (Brassica oleracea Var. capitata L.) Reveals Key Alternative Splicing Events Involved in Growth and Disease Response
Source: MDPI journal article supplement (doi:10.3390/ijms221910443), 2021-09-28
Supplement: s1 [file s1]

# Supplementary information

**Table S1. Summary statistics of circular consensus sequencing (CCS) reads.**

| Sample | CCS    | 5'-primer | 3'-primer | Poly-A | Full length | FLNC   | Average FLNC read length | Consensus reads |
|--------|--------|-----------|-----------|--------|-------------|--------|--------------------------|-----------------|
| flower | 318400 | 299898    | 302846    | 295493 | 233481      | 223333 | 2108                     | 113545          |
| fruit  | 426733 | 403791    | 408087    | 395756 | 240045      | 225834 | 989                      | 119533          |
| root   | 465686 | 434505    | 440723    | 436358 | 390619      | 381672 | 1682                     | 177861          |
| stem   | 445709 | 399511    | 410518    | 407923 | 360440      | 352724 | 2720                     | 164425          |
| leaf   | 260986 | 243089    | 244067    | 220238 | 200027      | 197655 | 2356                     | 93987           |

**Table S2. Statistics of corrected consensus reads.**

| <b>Sample</b> | <b>Type</b>       | <b>Total<br/>nucleotides</b> | <b>Total<br/>number</b> | <b>Mean<br/>length</b> | <b>Min<br/>length</b> | <b>Max<br/>length</b> | <b>N50</b> | <b>N90</b> |
|---------------|-------------------|------------------------------|-------------------------|------------------------|-----------------------|-----------------------|------------|------------|
| flower        | Before<br>correct | 225,296,240                  | 113,545                 | 1,985                  | 155                   | 16,407                | 3,637      | 966        |
| flower        | After<br>correct  | 227,681,700                  | 113,545                 | 2,006                  | 155                   | 16,183                | 3,688      | 976        |
| fruit         | Before<br>correct | 136,911,757                  | 119,533                 | 1,146                  | 140                   | 16,543                | 2,635      | 361        |
| fruit         | After<br>correct  | 129,807,796                  | 83,923                  | 1,547                  | 213                   | 16,551                | 2,906      | 550        |
| root          | Before<br>correct | 304,644,225                  | 177,861                 | 1,713                  | 166                   | 16,797                | 2,402      | 874        |
| root          | After<br>correct  | 304,947,061                  | 169,264                 | 1,802                  | 215                   | 14,997                | 2,439      | 908        |
| stem          | Before<br>correct | 452,639,577                  | 164,425                 | 2,753                  | 152                   | 17,192                | 3,226      | 1771       |
| stem          | After<br>correct  | 454,707,450                  | 161,417                 | 2,817                  | 262                   | 17,197                | 3,266      | 1790       |
| leaf          | Before<br>correct | 218,581,084                  | 93,987                  | 2,326                  | 173                   | 17,307                | 3,659      | 1132       |
| leaf          | After<br>correct  | 219,601,306                  | 90,515                  | 2,427                  | 243                   | 17,338                | 3,733      | 1170       |
